# Supplementary material for: Ripk3 signaling regulates HSCs during stress and represses radiation-induced leukemia in mice
Source: PubMed Central journal article supplement (PMC9213819; doi:10.1016/j.stemcr.2022.04.009), 2022-05-12
Supplement: mmc1.pdf [file mmc1.pdf]

**Stem Cell Reports, Volume 17**

**Supplemental Information**

**Ripk3 signaling regulates HSCs during stress and represses radiation-induced leukemia in mice**

**Lei Zhang, Huacheng Luo, Hong-Min Ni, Shanhui Liu, Hongyun Xing, Jun Zhang, Mark Sellin, Peter Breslin, S.J., Wei Wei, Mitchell F. Denning, William Small Jr., Wen-Xing Ding, Suming Huang, and Jiwang Zhang**

## Supplemental figures

**Figure S1. Strategy for analysis of BM HSCs and HPCs.**

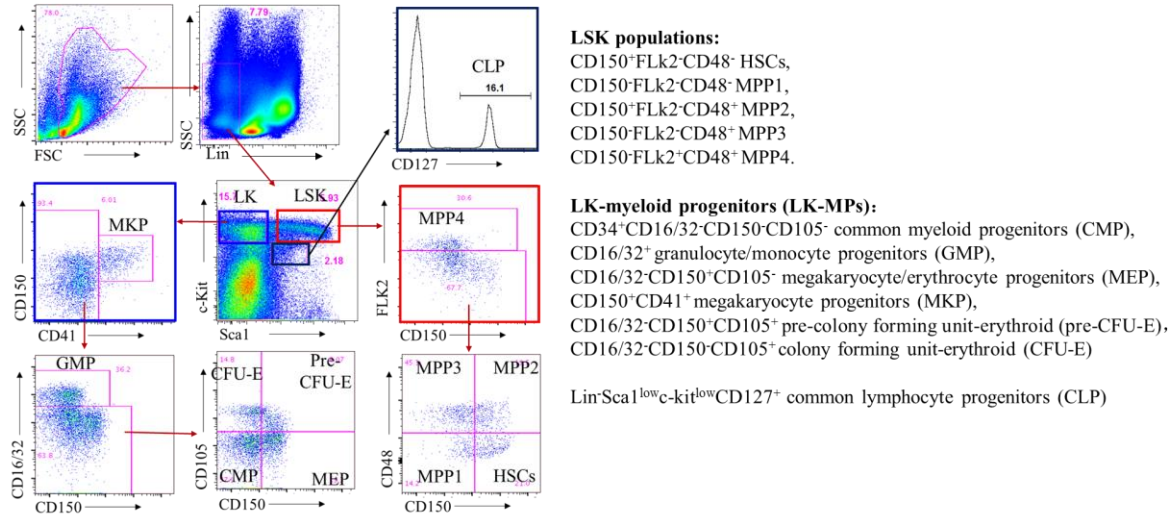

**Figure S2. Normal BM hematopoiesis in *Ripk3*<sup>-/-</sup> and *Mkl1*<sup>-/-</sup> mice under normal homeostatic conditions.** (Associated with Figure 1) BM were collected from *WT*, *Ripk3*<sup>-/-</sup> and *Mkl1*<sup>-/-</sup> mice. Six mice per genotype were studied (3 males, 3 females). All mice were analyzed at 6 months of age. Percentages of LK, LSK, HSCs and MPPs (a), and percentages of MKP, CMP, GMP, MEP, pre-CFU-E, CFU-E, and CLP (b) in the BM of *WT*, *Ripk3*<sup>-/-</sup> and *Mkl1*<sup>-/-</sup> mice are shown.

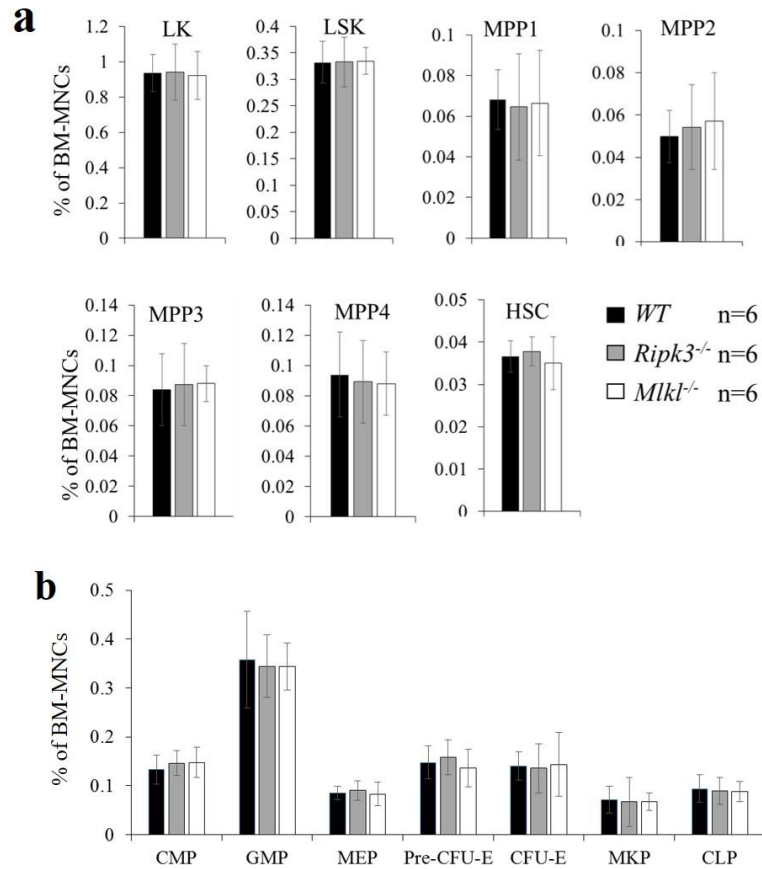

**Figure S3. *Ripk3* selectively regulates number and function of HSCs during serial transplantation in *Mkl1*-dependent and -independent manners, respectively.** (Associated with Figure 2) **a-c.** BM MNCs were collected from 3<sup>rd</sup> transplantation recipients of the indicated genotypes of donors. Percentages of LK cells and LSK cells (**a**), as well as HSCs and MPPs (**b**) in BM from 3<sup>rd</sup> transplantation recipients of the indicated genotypes of donors are shown. The percentages of CD11b<sup>+</sup> granulocytes/monocytes, B220<sup>+</sup> B lymphocytes and CD3<sup>+</sup> T lymphocytes in PB were analyzed by flow cytometry (**c**). **d.** BM MNCs were collected from *WT*, *Ripk3*<sup>-/-</sup> and *Mkl1*<sup>-/-</sup> mice (all were CD45.2<sup>+</sup>) and mixed with equal numbers of competitor BM MNCs (CD45.1<sup>+</sup>), respectively. The mixture of cells was studied using serial transplantation assay. The CHRC of the donor BM MNCs was examined by analyzing the CD45.2<sup>+</sup> cell % in the PB of the recipients after 4 months of each cycle of transplantation. \* and & indicate p<0.05 when compared to *WT* and *Ripk3*<sup>-/-</sup> groups, respectively.

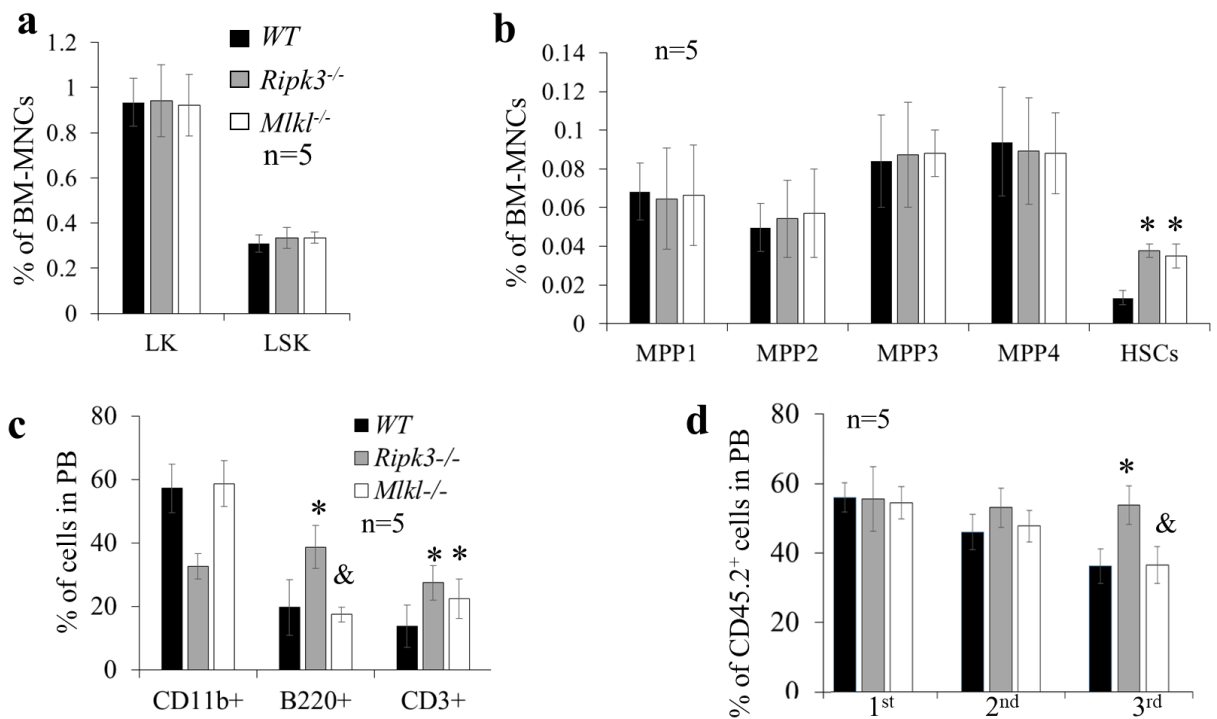

**Figure S4. *Ripk3* depletion prevents low dose radiation-induced loss of HSCs.** (Associated with Figure 4) **a-b.** *WT*, *Ripk3*<sup>-/-</sup> and *Mkl1*<sup>-/-</sup> mice were irradiated with X-rays, 1.75Gy weekly × 4. BM MNCs were collected from mice 1 month following the last IR. Percentages of HSCs and HPCs (a) and the numbers of MNCs (b) in the BM of indicated genotypes of mice are presented. Five mice were studied in each group. \* and \*\* stand for p<0.05 and p<0.01, respectively, when compared to non-irradiated *WT* mice. \$ indicates p<0.05 when compared irradiated *Ripk3*<sup>-/-</sup> and *Mkl1*<sup>-/-</sup> mice. **c.** *WT* and *Ripk3*<sup>-/-</sup> mice were irradiated with 1.75Gy X-rays every week. BM MNCs were collected from mice 14 and 21 days following the first IR. HSCs and HPCs were analyzed by flow cytometry. Representative flow cytometric data are presented. & indicates p<0.05 when compared to irradiated *Ripk3*<sup>-/-</sup> mice. **d.** Lethally-irradiated mice (CD45.1<sup>+</sup>) were transplanted with a mixture of *WT* (CD45.1<sup>+</sup>) and *Ripk3*<sup>-/-</sup> (CD45.2<sup>+</sup>) BM MNCs at a 1:1 ratio. One month after transplantation, mice were irradiated with 1.75Gy X-rays every week × 4 weeks. BM MNCs were collected 1 week following the last IR. The numbers of *WT* and *Ripk3*<sup>-/-</sup> HSCs and MPPs were analyzed by flow cytometry based on CD45.1 and CD45.2 expression. \*\* indicates p<0.01 compared to *WT* mice. **e.** *WT* mice were irradiated with 1.75Gy X-rays weekly. BM MNCs were collected from mice 14 and 30 days following the first IR. LSK-CD150<sup>+</sup>CD48<sup>-</sup>HSCs were purified by FACS and p-Ripk3 levels were analyzed by intracellular antibody staining. Data show one of the 3 biological triplicate experiments.

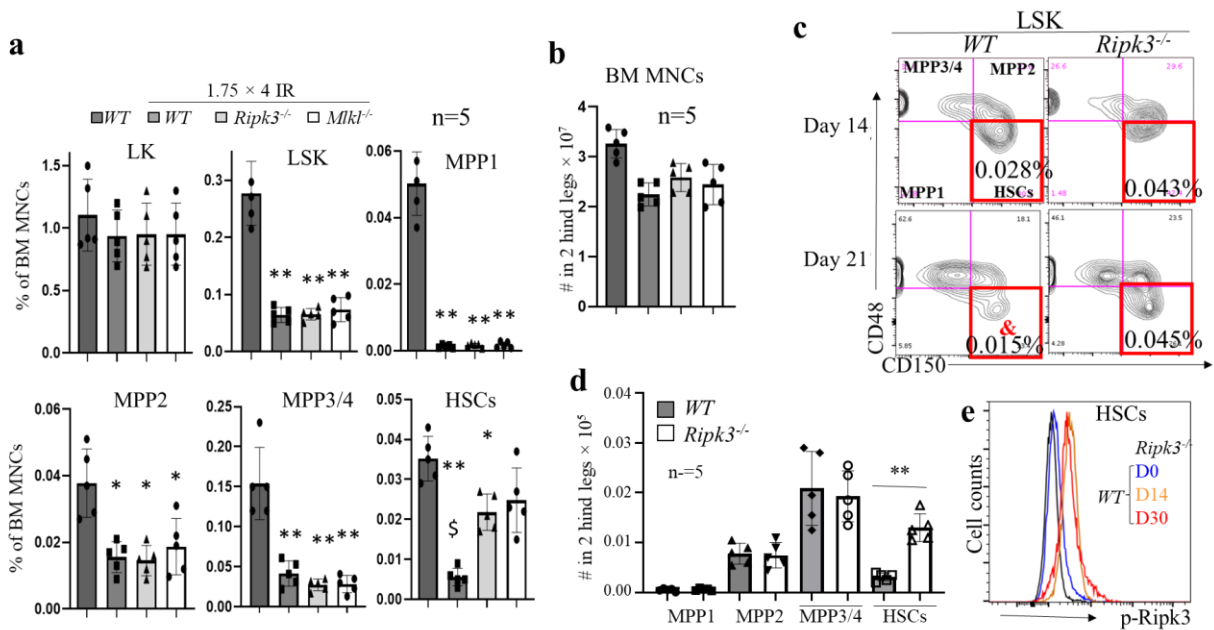

**Figure S5. Depletion of either *Tnfr* or *Ripk3* prevents low dose radiation-induced loss of HSCs.** (Associated with Figure 4) **a-b.** *WT*, *Tnfr*<sup>-/-</sup> and *Ripk3*<sup>-/-</sup> mice were irradiated with 1.75Gy X-rays every week × 4 weeks. BM MNCs were collected 1 month following the last IR. p-Ripk3 levels (**a**) in LSK cells and numbers of HSCs (**b**) were analyzed by flow cytometry. Data in **a** show one of the 3 biological triplicate experiments. \*\* indicates for p<0.01 compared to *WT* mice.

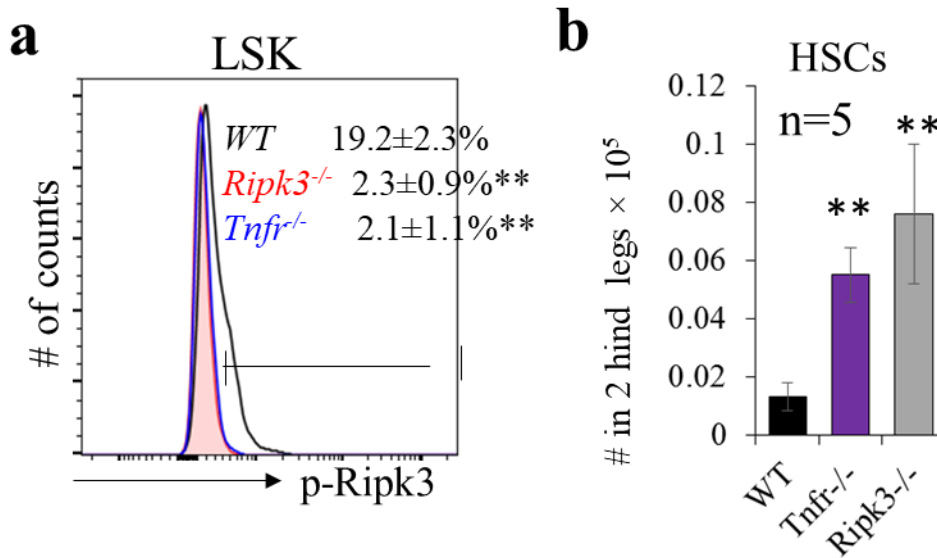

**Figure S6. *Tnf*-*Ripk3* signaling did not alter mitochondrial-ISR in LK HPCs.** (Associated with Figure 6) *WT*, *Ripk3*<sup>-/-</sup>, *Mkl1*<sup>-/-</sup> and *Tnfr*<sup>-/-</sup> mice were irradiated with X-ray, 1.75Gy weekly × 4. LK populations were collected from mouse BM 1 month after the last IR. p-eIF2α levels were examined by flow cytometry. Data in **a** and **c** show one of the 3 biological triplicate experiments.

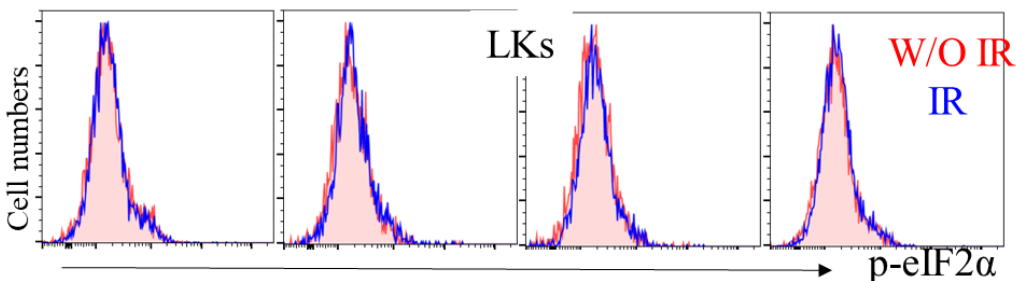

**Figure S7. Inhibition of PDH or ROS restores eIF2 $\alpha$ -Atf4-ISR signaling in irradiated *Mkl1*<sup>-/-</sup> HSCs.** (Associated with Figure 7) *Mkl1*<sup>-/-</sup> mice were irradiated with X-ray, 1.75Gy weekly  $\times$  4 and treated with vehicle (Veh), CPI-613 or NAC, respectively. LSK cells were collected from mouse BM 1 month after the last IR. LSKs isolated from IR *Ripk3*<sup>-/-</sup> mice were studied as controls. mtROS (a), p-eIF2 $\alpha$  (b), protein synthesis rate (c), and senescence (d) were examined by flow cytometry. Data in a-d show one of the 3 biological triplicate experiments.

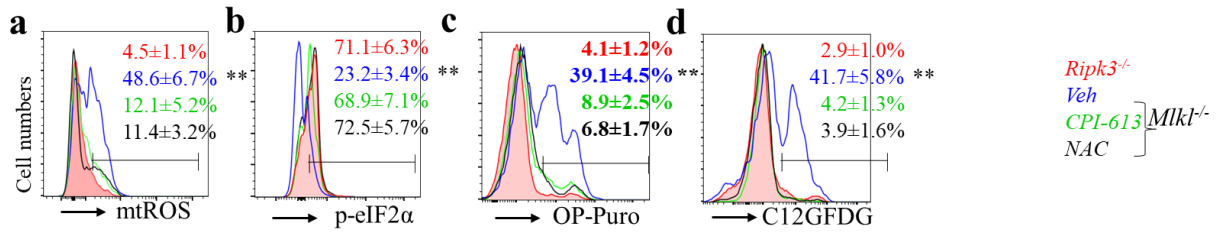

**Table 1. Primers for mouse genotypic analysis:**

|                                                                                                                    |
|--------------------------------------------------------------------------------------------------------------------|
| PCR primer sequences for genotyping of <i>Ripk3</i> <sup>-/-</sup> mice                                            |
| <i>Ripk3</i> -f: 5'-ggcttcattgtggaggtaagctgaga-3';                                                                 |
| <i>Ripk3</i> -r: 5'-gaaccctgggataagtgcacttgaat-3'.                                                                 |
| These primers generate a 280bp product in <i>WT</i> and a 320bp product in <i>Ripk3</i> -mutant mice.              |
| PCR primer sequences for genotyping of <i>Mkl1</i> <sup>-/-</sup> mice:                                            |
| <i>Mkl1</i> -p1: 5'-tatgacatggcaactcacg-3',                                                                        |
| <i>Mkl1</i> -p2: 5'-accatctcccaactgtga-3'                                                                          |
| <i>Mkl1</i> -p3: 5'-tccttcagcacctcgta at-3'.                                                                       |
| These primers generate a 498bp <i>WT</i> product and a 158bp product for the recombined Δ-exon 3 <i>Mkl1</i> gene. |
| PCR primer sequences for genotyping of <i>Tnfr1</i> <sup>-/-</sup> mice:                                           |
| <i>Tnfr1a</i> -p1: 5'-ggattgtcacggtgccgttgaag-3'                                                                   |
| <i>Tnfr1a</i> -p2: 5'-tgacaaggacacggtgtgtggc-3'                                                                    |
| <i>Tnfr1a</i> -p3: 5'-tgctgatggggatacatccatc-3'                                                                    |
| These primers generate a 120bp <i>WT</i> product and a 155bp product in <i>Tnfr1a</i> -mutant mice.                |

**Table 2. Primers used for qRT-PCR:**

| Taqman primers and probes | Purchased from Thermo Fisher Scientific |
|---------------------------|-----------------------------------------|
| <i>Bcl2</i>               | <i>Mm00477631_m1</i>                    |
| <i>cIAP2</i>              | <i>Mm01168413_m1</i>                    |
| <i>Bcl-x</i>              | <i>Mm00437783_m1</i>                    |
| <i>Puma</i>               | <i>Mm00519268_m1</i>                    |
| <i>NoxA</i>               | <i>Mm00451763_m1</i>                    |
| <i>Bim</i>                | <i>Mm00437783_m1</i>                    |
| <i>p16</i>                | <i>Mm00494449_m1</i>                    |
| <i>p19</i>                | <i>Mm00486943_m1</i>                    |
| <i>p15</i>                | <i>Mm00483241_m1</i>                    |
| <i>p53</i>                | <i>Mm01731290_g1</i>                    |
| <i>Gapdh</i>              | <i>Mm99999915_g1</i>                    |
| <i>Calcr1</i>             | <i>Mm00516985_m1</i>                    |
| <i>Klf4</i>               | <i>Mm00516104_m1</i>                    |
| <i>Wbp4</i>               | <i>Mm01324202_m1</i>                    |
| <i>Fkbp1a</i>             | <i>Mm01243847_g1</i>                    |
| <i>P2ry13</i>             | <i>Mm00546978_m1</i>                    |
| <i>Banp</i>               | <i>Mm00479456_m1</i>                    |
| <i>Lcn2</i>               | <i>Mm01324470_m1</i>                    |
| <i>Snx20</i>              | <i>Mm00446029_m1</i>                    |
| Primers                   | for qRT-PCR using SYBR Green assay      |
| <i>Atf4</i> -f            | 5'-aacaagacagcagccactaggt,              |
| <i>Atf4</i> -r            | 5'-tctgccttctttcagagcctca               |
| <i>Grp78</i> -f           | 5'-cagatcttccacggct-3'                  |
| <i>Grp78</i> -r           | 5'-tgtcactcggagaataacc at-3'            |
| <i>Chop</i> -f            | 5'-ccagaataacagccggaactga-3'            |
| <i>Chop</i> -r            | 5'-tcctgcagatcctataccag-3';             |
| <i>Erdj4</i> -f           | 5'-ggatggttctagtagacaaagg-3'            |
| <i>Erdj4</i> -r           | 5'-cttcgttgagtgcagtcctgc-3'             |
| <i>Dnajb8</i> -f          | 5'-tcggtgctggtcatccctt-3'               |
| <i>Dnajb8</i> -r          | 5'-gggaactcaccaaagcccga-3'              |
| <i>Xbp1s</i> -f           | 5'-gagtcgcagcaggtg-3'                   |
| <i>Xbp1s</i> -r           | 5'-gtgtcagatccatggga-3'                 |



|                        |                                     |
|------------------------|-------------------------------------|
| <i>Xbp1 total-f</i>    | 5'-aacagagtagcagcgcagac-3'          |
| <i>Xbp1 total-r</i>    | 5'-caggatccagcgtgtcca t-3'          |
| <i>β-actin-f</i>       | 5'-ggctgtattcccctccatcg-3'          |
| <i>β-actin-r</i>       | 5'-ccagttggtaacaatgccatg t-3'       |
|                        |                                     |
| RT-PCR primers         | for detecting <i>xbp1</i> splicing: |
| <i>xbp1</i> splicing-f | 5'-acacgcttggaatggaac-3'            |
| <i>xbp1</i> splicing-r | 5'-ccatgggaagatgttctggg-3'          |

**Table 3. Antibodies for flow cytometric analysis and Western blot analysis**

| <b>Antibodies for intracellular staining and flow cytometry</b>                | Vendors                      | Cat #      |
|--------------------------------------------------------------------------------|------------------------------|------------|
| Phospho-p38 MAPK (Thr180/Tyr182) (3D7) Rabbit mAb (Alexa Fluor® 647 Conjugate) | Cell Signaling Technology    | 14594      |
| Phospho-NF-κB p65 (Ser536) (93H1) Rabbit mAb (Alexa Fluor® 647 Conjugate)      | Cell Signaling Technology    | 4887       |
| Phospho-RIP3 (Thr231/Ser232) (E7S1R) Rabbit mAb (Alexa Fluor® 488 Conjugate)   | Cell Signaling Technology    | 47477      |
| p44/42 MAPK (Erk1/2) (137F5) Rabbit mAb (Alexa Fluor® 647 Conjugate)           | Cell Signaling Technology    | 5376       |
| Phospho-GSK-3β (Ser9) (D85E12) XP® Rabbit mAb (Alexa Fluor® 647 Conjugate)     | Cell Signaling Technology    | 14332      |
| Phospho-eIF2α (Ser51) (D9G8) XP® Rabbit mAb (Biotinylated)                     | Cell Signaling Technology    | 5199       |
| Alexa Fluor 488 Goat anti-Rabbit IgG                                           | ThermoFisher Scientific      | A-11034    |
| Rabbit monoclonal phospho-eIF2α (Ser51)                                        | ThermoFisher Scientific      | 44-728G    |
| FAM-FLICA® Caspase-1 (YVAD) Assay Kit                                          | ImmunoChemistry Technologies | 97         |
|                                                                                |                              |            |
| <b>Antibodies for Western blotting</b>                                         |                              |            |
| RIP3 (D4G2A) Rabbit mAb (Mouse-Specific)                                       | Cell Signaling Technology    | 95702      |
| Anti-RIP3 antibody (Mouse-Specific)                                            | Abcam                        | ab56164    |
| Phospho-RIP3 (Thr231/Ser232) Antibody (Mouse-Specific)                         | Cell Signaling Technology    | 57220      |
| Phospho-MLKL (Ser345) (D6E3G) Rabbit mAb                                       | Cell Signaling Technology    | 37333      |
| MLKL (D6W1K) Rabbit mAb (Mouse-Specific)                                       | Cell Signaling Technology    | 37705      |
| OPA1 (D6U6N) Rabbit mAb                                                        | Cell Signaling Technology    | 80471      |
| ATF-4 (D4B8) Rabbit mAb                                                        | Cell Signaling Technology    | 11815      |
| Phospho-PERK (Thr980) Monoclonal Antibody (G.305.4)                            | Thermofisher Scientific      | MA5-15033  |
|                                                                                |                              |            |
| <b>Antibodies for HSCs and HPCs analysis</b>                                   |                              |            |
| Brilliant Violet 421™ anti-mouse Ly-6G/Ly-6C (Gr-1) Antibody                   | Biolegend                    | 108434     |
| Brilliant Violet 421™ anti-mouse CD3ε Antibody                                 | Biolegend                    | 100336     |
| Brilliant Violet 421™ anti-mouse B220 Antibody                                 | Biolegend                    | 103240     |
| Brilliant Violet 421™ anti-mouse TER-119/Erythroid Cells Antibody              | Biolegend                    | 116233     |
| PE anti-mouse Ly-6A/E (Sca-1) Antibody                                         | Biolegend                    | 108108     |
| APC anti-mouse CD117 (c-Kit) Antibody                                          | Biolegend                    | 105812     |
| APC/Cy7 anti-mouse CD48 Antibody                                               | Biolegend                    | 103431     |
| PE/Cy7 anti-mouse CD150 (SLAMF7) Antibody                                      | Biolegend                    | 115914     |
| PE/Cy5 anti-mouse CD135 Antibody                                               | Biolegend                    | 135312     |
| PerCP/Cy5.5 anti-mouse CD127 (IL-7Rα) Antibody                                 | Biolegend                    | 135022     |
| CD41a Monoclonal Antibody (eBioMWRReg30 (MWRReg30)), PerCP-eFluor 710          | Life technologies            | 46-0411    |
| FITC anti-mouse CD117                                                          | BD Bioscience                | 553354     |
| PE-Cy7 anti-mouse CD3ε                                                         | BD Bioscience                | 552774     |
| PE anti-mouse CD11b                                                            | Thermo Fisher Scientific     | 12-0112-85 |
| APC Anti-human/mouse CD45R                                                     | Thermo Fisher Scientific     | 17-0452-82 |
| PE anti-mouse CD8a                                                             | Thermo Fisher Scientific     | 12-0081-82 |
| APC Anti-mouse CD4                                                             | Thermo Fisher Scientific     | 17-0041-83 |
| FITC CD3ε Monoclonal Antibody (145-2C11),                                      | Thermo Fisher Scientific     | 11-0031-82 |

## Supplementary Material and Methods

**Analysis of levels of intracellular ROS and mitochondrial ROS.** BM-MNCs ( $1 \times 10^6$ /ml) were stained with antibodies against lineage markers, anti-Sca-1-PE/FITC and anti-c-kit-APC antibodies in PBS supplemented with 5mM glucose, 1mM CaCl<sub>2</sub>, 0.5mM MgSO<sub>4</sub>, and 5mg/ml BSA and then incubated with 10 $\mu$ M of the cell-permeant 2',7'-dichlorodihydrofluorescein diacetate (H2DCFDA) (ThermoFisher, D399) or MitoSOX™ Red Mitochondrial Superoxide Indicator (ThermoFisher, M36008) for 10-30 min. at 37 °C. Levels of intracellular ROS and mitochondrial ROS in LK- and LSK-cells were analyzed using a FACS Fortessa flow cytometer (Becton-Dickinson, San Jose, CA, USA). For each sample, a minimum of 300,000 BM-MNCs were acquired and the data were analyzed using Flowjo software. In all experiments, PE and APC isotype controls and other positive and negative controls were included as appropriate.

**MitoTracker analysis:** Bone marrow cells were incubated in 20nM MitoTracker Green (M7514; Molecular Probes) according to the manufacturer's instructions for 15 min. at 37 °C. After washing the cells twice with PBS, cells were stained with HSC cell surface markers. Cells were washed twice with PBS and then analyzed using FACS.

**Senescence analysis.** SA- $\beta$ -gal activity in sorted LSK cells was determined using a Senescence  $\beta$ -Galactosidase Staining Kit from Cell Signaling Technology (#9860) according to the manufacturer's instructions and analyzed by flow cytometry.

**Seahorse Assays.** XF96 extracellular flux assay kits (Agilent Technologies, 102417-100) were used to measure oxygen consumption (OCR). LSK cells were sorted, and directly plated into XF96 cell culture microplates. OCR was measured according to the protocol supplied by the manufacturer. Briefly, five replicate wells of  $1-2 \times 10^5$  cells were seeded into a Cell-Tak coated 96-well XF96 well plate (Corning, 324240). Thirty minutes prior to analysis, the medium was replaced with Seahorse XF medium (Agilent Technologies, 102353-100) and the plate was incubated at 37°C. Analyses were performed at basal conditions.

**Measuring protein synthesis.** BM MNCs were collected from mice 1 hour after intraperitoneal administration of OP-Puro 50mg/kg body weight (Opropargyl-puromycin; pH 6.4-6.6 in PBS). BM MNCs ( $4 \times 10^6$ ) were stained with antibodies against cell surface markers as described above. After washing, cells were fixed, permeabilized, and the azide-alkyne cycloaddition was performed using the Click-iT Cell Reaction Buffer Kit (Life Technologies, Cat#: C10269) with 5  $\mu$ M Alexa Fluor™ 488 Azide (Life Technologies). The protein synthesis rate was measured by flow cytometry.

**Analysis of apoptosis using Annexin-V staining and caspase activity.** LK and LSK cells were stained with propidium iodide and APC-conjugated Annexin-V in Annexin binding buffer following the manufacturer's instructions (BD Biosciences). Apoptosis was further verified by examining Caspase 3 activity using active-Caspase-3 staining kits following the manufacturer's instructions (eBioscience).

**Colony-forming cell (CFC) assay.** The CFC assay was performed by culturing BM-MNCs in MethoCult GF M3434 methylcellulose medium (Stem Cell Technologies, Vancouver, BC). Colonies of CFU-granulocyte macrophage (GM) and burst-forming unit-erythroid (BFU-E) were

scored on day 7 and those of CFU-granulocyte, -erythrocyte, -monocyte, and -megakaryocyte (GEMM) were scored on day 12 of incubation according to the manufacturer's protocol.

**Western blotting.** Cell lysates from BM MNCs were extracted using Cell Lysis Buffer (Cell Signaling) followed by a brief sonication. The supernatants were collected after centrifugation at 4 °C., 14,000×g for 20 min. Protein samples were separated by SDS-PAGE on 10% or 12% acrylamide gels. Proteins were transferred onto nitrocellulose membranes to examine the target proteins by antibody blotting. Antibodies used in this study are listed in Antibodies for Western blotting (**Table 3**). The band quantifications using Multi Gauge 3.0 were normalized to corresponding controls, which were set to 1.00 after being normalized to corresponding loading standards on the Western blot.

**Serial transplantation assay.** BM-MNCs were collected from 2 month-old *WT*, *Ripk3*<sup>-/-</sup> and *Mkl1*<sup>-/-</sup> mice (CD45.2<sup>+</sup>) and were transplanted into lethally-irradiated (9.5Gy IR) Ptprc (CD45.1<sup>+</sup>) mice. Five recipients were used in each group, 5 × 10<sup>6</sup> MNCs were transplanted per recipient. PB and BM were collected from recipient mice 4 months post-transplantation for phenotypic analysis using flow cytometry. MNCs from all 5 recipients in each group were pooled and transplanted into lethally-irradiated 2<sup>nd</sup> Ptprc recipients, respectively. Five recipients were used in each group, 1 × 10<sup>7</sup> MNCs were transplanted per recipient. The same procedure was followed for the 3<sup>rd</sup> transplantation.

**Competitive repopulation and serial transplantation assay.** Donor BM-MNCs were collected from 2 month-old *WT*, *Ripk3*<sup>-/-</sup> and *Mkl1*<sup>-/-</sup> mice (CD45.2<sup>+</sup>) and were mixed, respectively, with equal numbers of competitor BM-NMCs collected from 2-month-old Ptprc (CD45.1<sup>+</sup>) mice. The mixtures of BM cells were transplanted into lethally-irradiated (9.5Gy) Ptprc (CD45.1<sup>+</sup>) mice by tail-vein injection. Five recipient mice were used in each group, 5 × 10<sup>5</sup> donor NMCs and 5 × 10<sup>5</sup> competitor NMCs per recipient. PB samples were collected from all recipients 4 months after transplantation. Donor cell engraftments were analyzed by examining % of CD45.2<sup>+</sup> cells in PB as assessed by flow cytometry. T-cell, B-cell, granulocyte, and monocyte/macrophage lineage contributions of the donor cells were analyzed by staining with anti-CD3, anti-B220, anti-Gr-1, and anti-Mac-1, respectively. For 2<sup>nd</sup> transplantations, MNCs from all 5 recipients in each group were pooled and transplanted into lethally-irradiated 2<sup>nd</sup> Ptprc recipients, respectively. Five recipients were used per group, 1 × 10<sup>7</sup> MNCs per recipient. The exact same procedures were followed for the 3<sup>rd</sup> transplantation.

**RNAseq Analysis.** LSK and LK cells were purified from BM of *WT* and *Ripk3*<sup>-/-</sup> mice by FACS 1 month after 1.75 × 4 IR. Two biological replicates were analyzed for each sample. Each sample consisted of a mixture of the indicated cells from 4-5 mice. Total RNA was isolated from these cells using TRIzol reagent (Invitrogen, Carlsbad, CA) following the manufacturer's protocol. Raw data FASTQ files were aligned to the mouse genome (mm9) using Tophat (version 2.0) and Bowtie2.(Langmead et al., 2009) TopHat software was used to analyze RNA-Seq data in order to discover splice junctions.(Bai et al., 2016) Gene expression profiles for the individual samples were calculated as FPKM (paired-end fragments per kilobase of exon model per million mapped reads) values. The Gene Ontology analysis was carried out with the Database for Annotation, Visualization and Integrated Discovery (DAVID) tool (<https://david.ncifcrf.gov/>, Version 6.8).(Huang da et al., 2009) The differential expression cluster for heatmap was generated using

JavaTreeview.(Saldanha, 2004) The RNAseq dataset was deposited into the Gene Expression Omnibus archive (accession no. GSE70899) and GEO number (GSE139143).

**Statistical analyses.** Data are expressed as means  $\pm$ SD. Two-way ANOVA (multiple groups) and Student's *t*-test (two groups) were performed to determine the statistical significance of differences among and between experimental groups.  $P < 0.05$  was considered significant. All these analyses were done using GraphPad Prism from GraphPad Software (San Diego, CA).

## References

- Bai, Y., Kinne, J., Donham, B., Jiang, F., Ding, L., Hassler, J.R., and Kaufman, R.J. (2016). Read-Split-Run: an improved bioinformatics pipeline for identification of genome-wide non-canonical spliced regions using RNA-Seq data. *BMC genomics* *17 Suppl 7*, 503.
- Huang da, W., Sherman, B.T., and Lempicki, R.A. (2009). Systematic and integrative analysis of large gene lists using DAVID bioinformatics resources. *Nature protocols* *4*, 44-57.
- Langmead, B., Trapnell, C., Pop, M., and Salzberg, S.L. (2009). Ultrafast and memory-efficient alignment of short DNA sequences to the human genome. *Genome Biol* *10*, R25.
- Saldanha, A.J. (2004). Java Treeview--extensible visualization of microarray data. *Bioinformatics* *20*, 3246-3248.
